# Supplementary material for: Prevalence of Anti-SARS-CoV-2 Antibodies in Poznań, Poland, after the First Wave of the COVID-19 Pandemic
Source: MDPI journal article supplement (doi:10.3390/vaccines9060541), 2021-05-21

# Figure S1

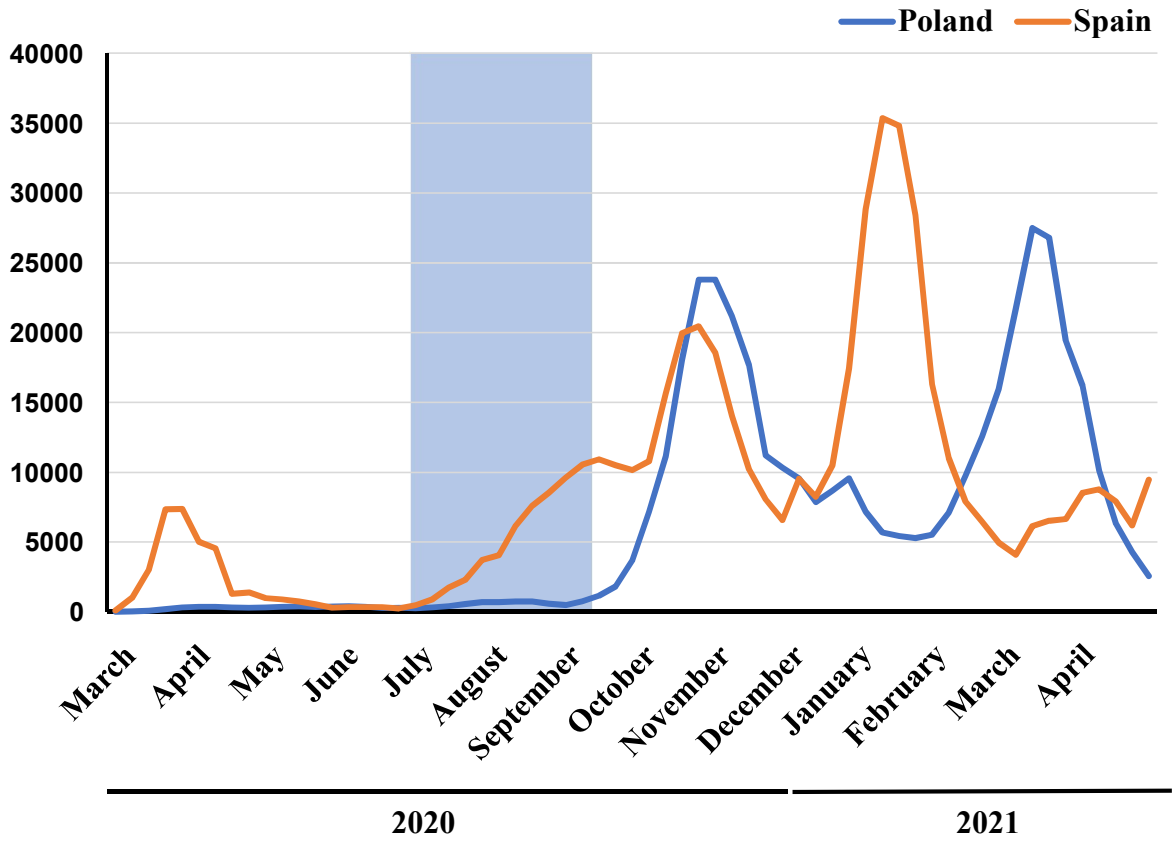

Supplement: s1 [file s1]
